# Supplementary material
Source: PubMed Central journal article supplement (PMC4076012)
Supplement: NIHMS579075-supplement-S1.pdf [file NIHMS579075-supplement-S1.pdf]

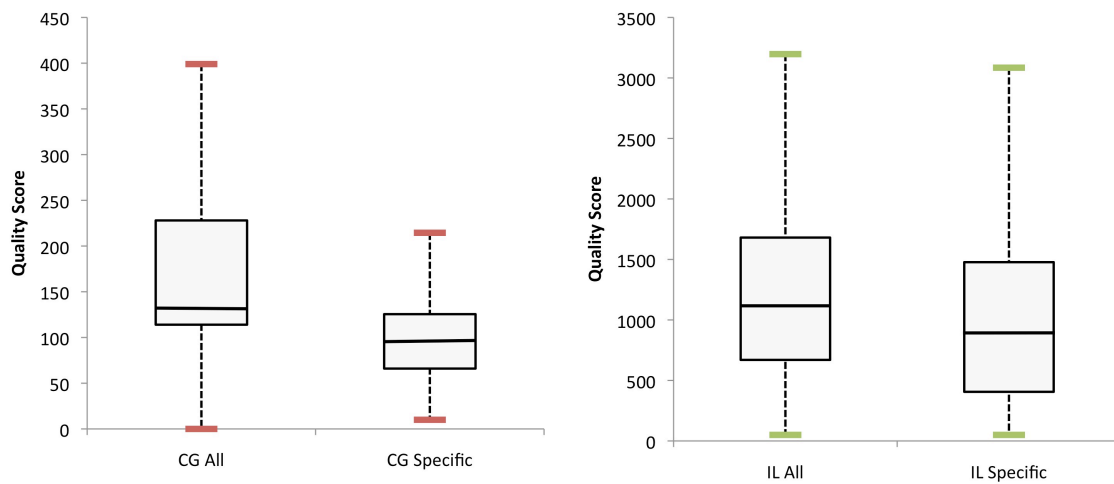

**Figure S1**

SNV quality in different platforms. Comparing the phred-scale quality scores of all SNVs from each platform to that of the specific SNVs. Each column represents (from top to bottom) the upper whisker, upper hinge, median, lower hinge and lower whisker. Outliers are not shown.

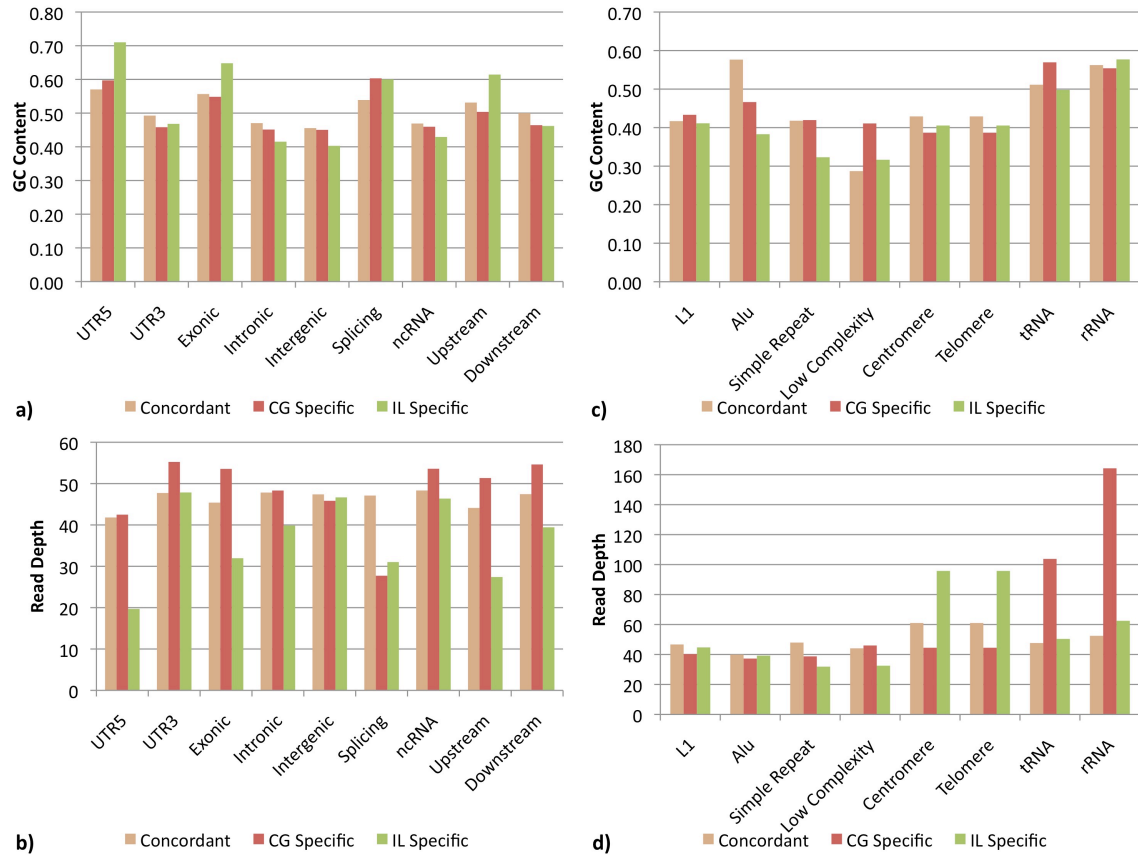

**Figure S2**

GC content and read depth of SNVs in different genomic elements. a) GC content of SNVs in gene elements. b) Read depth of SNVs in gene elements. c) GC content of SNVs in repetitive elements. d) Read depth of SNVs in repetitive elements.
